# Supplementary material for: Human Defensins Inhibit SARS-CoV-2 Infection by Blocking Viral Entry
Source: MDPI journal article supplement (doi:10.3390/v13071246), 2021-06-26
Supplement: s1 [file s1]

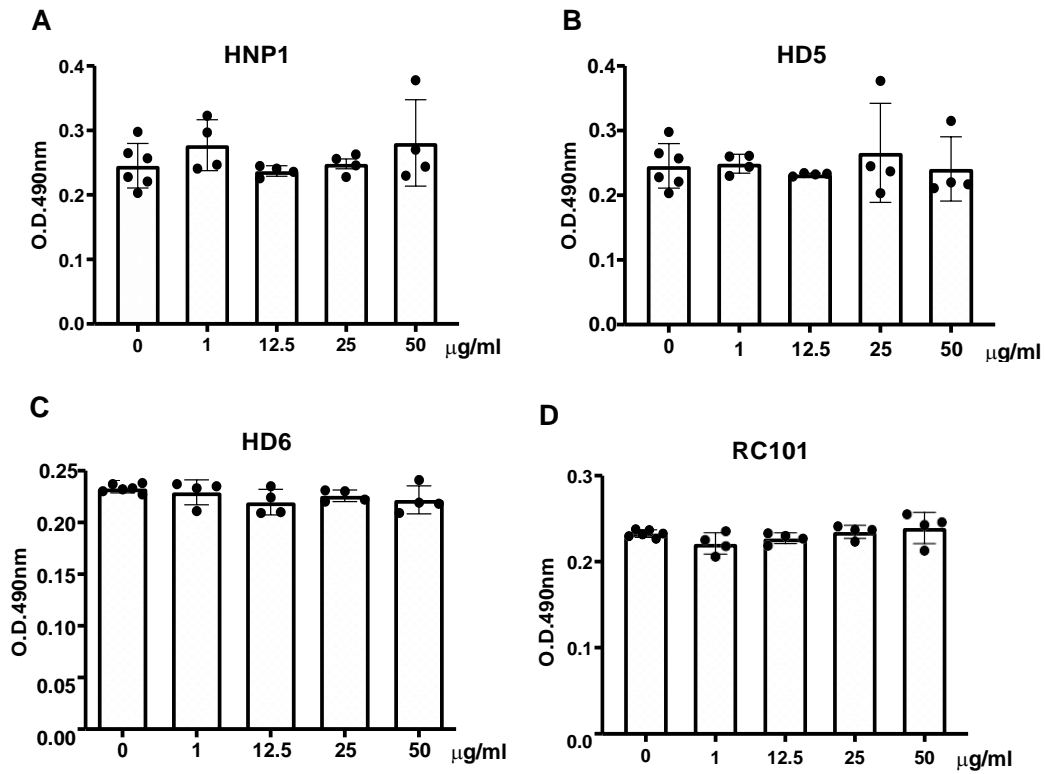

**Fig S1. Defensins with anti-SARS-CoV2 activity are not cytotoxic.** hACE2-expressing HEK293T cells were treated for 24 hours with the indicated concentration of HNP1 (A), HD5 (B), HD6 (C), and RC101 (D). Cell viability was determined by MTS-based CellTiter 96® AQueous One Solution Cell Proliferation Assay. Data are mean ± SD of 4-6 samples, and are representative of two independent experiments.
